# Supplementary material for: Intranasal Delivery of a Methyllanthionine-Stabilized Galanin Receptor-2-Selective Agonist Reduces Acute Food Intake
Source: PubMed Central journal article supplement (PMC8804135; doi:10.1007/s13311-021-01155-x), 2021-12-02
Supplement: 13311_2021_1155_MOESM8_ESM.pdf [file 13311_2021_1155_MOESM8_ESM.pdf]

## SUPPLEMENTARY MATERIAL

to

### **Intranasal delivery of a methyllanthionine-stabilized galanin receptor-2-selective agonist reduces acute food intake**

Anneke Kuipers<sup>1</sup>, Márta Balasko<sup>2</sup>, Erika Pétervári<sup>2</sup>, Andreas Koller<sup>3,4</sup>, Susanne M. Brunner<sup>3,4</sup>, Gert N. Moll<sup>1,5</sup>, Barbara Kofler<sup>3\*</sup>

#### **Supplementary methods**

##### ***In vitro stability in brain plasma***

Sprague dawley rat brain lyophilized powder was purchased from MyBioSource (San Diego, USA). One gram brain powder was reconstituted in 10 ml PBS, 0.5 ml 2 M Tris (pH=8), 100 µl Triton X-100 and 10 mg SDS. The solution was centrifuged and the supernatant was collected, aliquoted and stored at -20°C until usage. To assess the stability, 10 µM GAL-(1-15) and 10 µM M89b were incubated in 1% brain plasma buffered with 200 mM phosphate buffer (pH 7.4) at 37°C for up to 6 hours. At various time points (0, 15, 30, 60, 120 and 360 min), 200 µl sample was quenched with 10 µl 50% TFA and 20 µl 100% ACN. Samples were centrifuged and kept on ice. Full-length peptides were quantified by using a C12 column (C12 RP 250 x 4.60 mm column, Phenomenex) on a JASCO HPLC system and applying a gradient of 20-90% ACN in 0.1% TFA for 30 minutes. Peptides were detected at 280 nm. A280 areas in chromatograms of the corresponding GAL-(1-15) and M89b full-length peptide peaks were used to determine the amount of peptide left after incubation with cerebrospinal fluid at the different time points. Peptide peaks were determined using JASCO-Borwin Chromatography software (v1.50).

Supplementary figures

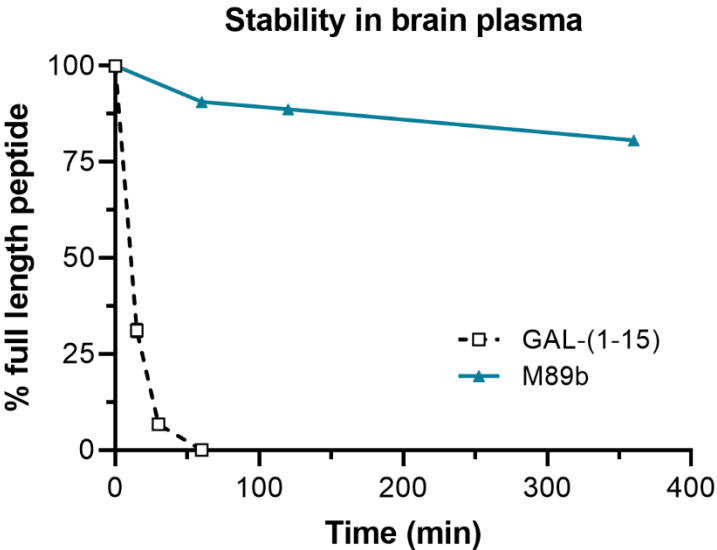

**Supplementary Figure S1** M89b has increased *in vitro* stability in brain plasma. Degradation of M89b in comparison to GAL-(1-15) in 1% rat brain plasma over time. Data represent means  $\pm$  SEM. n=3.
